# Supplementary material for: BDNF controls bidirectional endocannabinoid-plasticity at corticostriatal synapses
Source: bioRxiv or medRxiv preprint supplement (doi:10.1101/550947), 2019-03-21

# Supplementary Figure 2

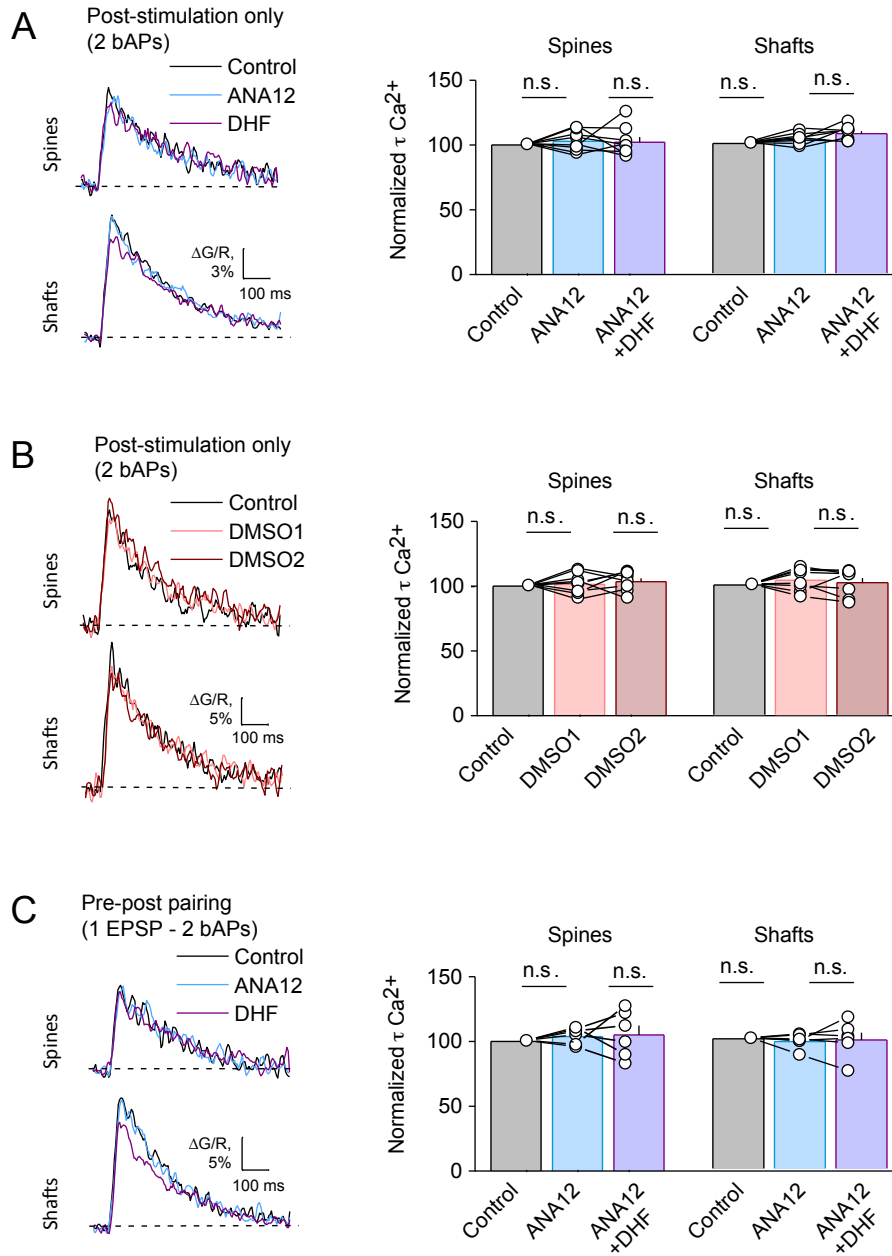

Supplement: Supplementary file [file media-2.pdf]
